# Supplementary material for: Single-component organic molecular ferroelectrics based on disk- or wheel-like rotation
Source: Royal Society of Chemistry journal article supplement (doi:10.1039/d1tc03117a), 2021-01-01
Supplement: d1tc03117a1.pdf [file d1tc03117a1.pdf]

## **Single-component organic molecular ferroelectrics based on disk- or wheel-like rotation**

Sachio Horiuchi<sup>1</sup>, Reiji Kumai<sup>2</sup>, and Shoji Ishibashi<sup>3</sup>

<sup>1</sup>Research Institute for Advanced Electronics and Photonics (RIAEP), National Institute of Advanced Industrial Science and Technology (AIST), AIST Tsukuba  
Central 5, 1-1-1 Higashi, Tsukuba, Ibaraki 305-8565, Japan

<sup>2</sup>Condensed Matter Research Center (CMRC) and Photon Factory, Institute of Materials Structure Science, High Energy Accelerator Research Organization (KEK), Tsukuba 305-0801, Japan

<sup>3</sup>Research Center for Computational Design of Advanced Functional Materials (CD-FMat), National Institute of Advanced Industrial Science and Technology (AIST), AIST Tsukuba  
Central 2, Tsukuba 305-8568, Ibaraki, Japan

### **Electronic Supplementary Information**

| <b>Tables of contents</b>          | <b>Pages</b> |
|------------------------------------|--------------|
| 1. Crystallography                 | 2            |
| 2. Thermal and Electric Properties | 3            |

## 1. Crystallography

Crystallographic data collection and structural refinement information for MSMA at room temperature.

### Crystal data

$C_4H_8N_2O_4S$ ;  $M_r = 424.34$

$V = 741.39(5) \text{ \AA}^3$

Orthorhombic,  $Pna2_1$  (No. 33)

$Z = 4$  ( $Z' = 1$ )

$a = 9.2973(4) \text{ \AA}$

Mo $K\alpha$  radiation ( $\lambda = 0.71073 \text{ \AA}$ )

$b = 6.9862(3) \text{ \AA}$

$T = 296 \text{ K}$

$c = 11.4143(4) \text{ \AA}$

$0.40 \times 0.16 \times 0.14 \text{ mm}^3$

Calculated crystal density,  $1.614 \text{ g/cm}^3$

### Data collection and refinement

Four-circle diffractometer (Rigaku AFC10) equipped with a hybrid pixel detector (PILATUS200K).

$R_{\text{int}} = 0.0059$

$2\theta_{\text{max}} = 55^\circ$

$R[F^2 > 2\sigma(F^2)] = 0.024$

1266 reflections

$wR(F^2) = 0.063$

118 parameters

$S = 1.090$

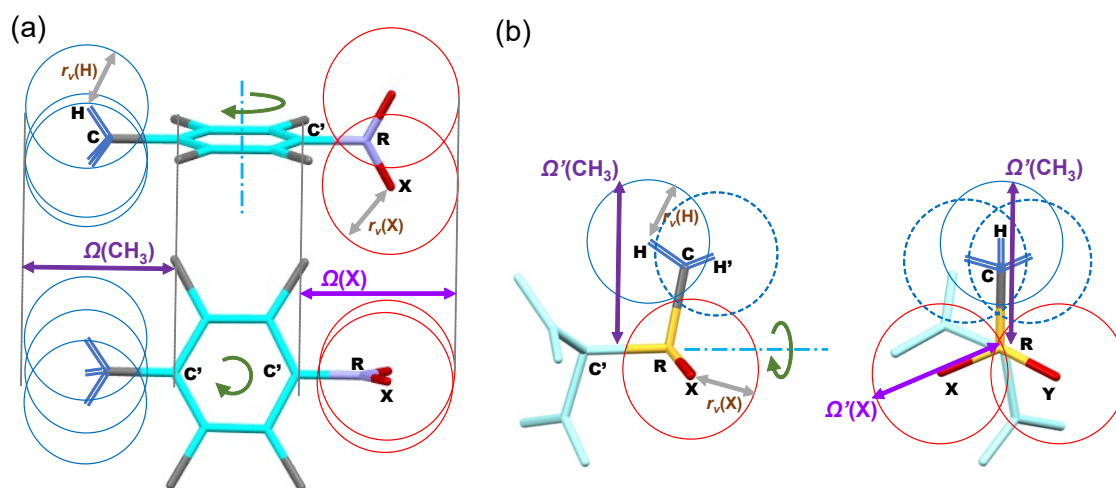

**Figure S1.** Schematic illustrations of substituent's structural parameters  $\Omega$  and  $\Omega'$  defined as the magnitude of projection (overhanging) along the radial direction of the rotator. (a) Distances  $\Omega$  measured from the root carbon atom on the ring for a disk-like rotator. Example is PMNB (R = N and X = O). (b) Distances  $\Omega'$  measured from the rotation axis for a wheel-like rotator. Example is MSMA (R = S, X = Y = O). The circles represent the van der Waals radii  $r_v(\text{X})$  and  $r_v(\text{H})$  of the terminal X and hydrogen atoms.



## 2. Thermal and Electric Properties

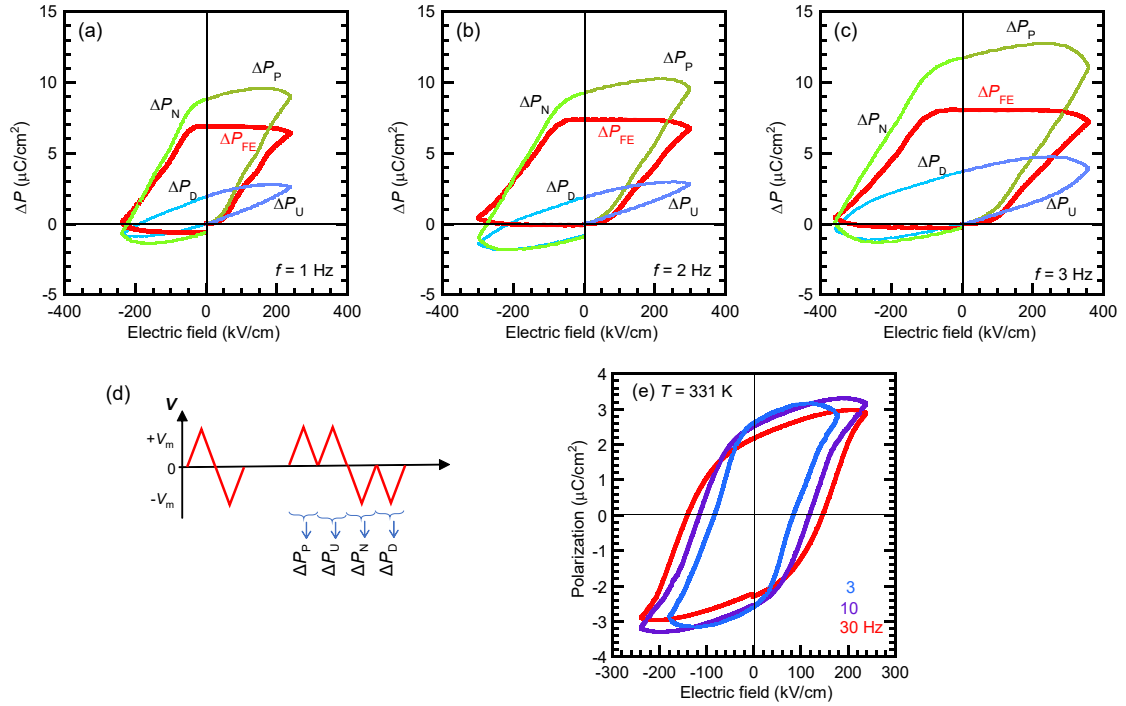

**Figure S2.** Indication of intrinsic ferroelectricity of a PMNB crystal. (a-c) Correction of polarization hysteresis loops (a) at frequency  $f = 1$  Hz, (b) 2 Hz, and (c) 3 Hz using the positive-up-negative-down (PUND) procedure (also called “double-wave method”: for details, see also M. Fukunaga and Y. Noda, *J. Phys. Soc. Jpn.* 2008, **77**, 064706). The panel (d) schematically illustrates the voltage waveform with ac electric field of triangular waveform. In the double wave, the first and second positive voltage waves are called “positive (P)” and “up (U)”, respectively, and the first and second negative ones are “negative (N)” and “down (D)”, respectively. The polarization reversal occurs during the processes P and N, which measure the total polarization changes  $\Delta P_P$  and  $\Delta P_N$ , respectively. The processes U and D retain the polarity and then can extract the non-hysteresis contributions  $\Delta P_U$  and  $\Delta P_D$ , respectively. The intrinsic ferroelectric hysteresis contribution  $\Delta P_{FE}$  was obtained as  $\Delta P_P - \Delta P_U$  and  $\Delta P_N - \Delta P_D$ . (e) The  $P$ - $E$  hysteresis curves at various frequencies at  $T = 331$  K.

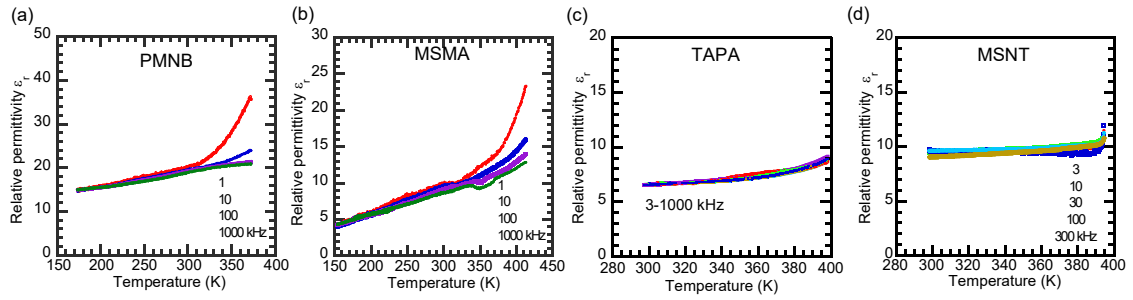

**Figure S3.** Temperature-dependent relative permittivity  $\epsilon_r$  measured with an ac field of various frequencies: (a) PMNB with an  $E||c^*$  configuration, (b) MSMA with an  $E\perp(011)$  configuration, (c) TAPA with an  $E\perp(011)$  configuration, and (d) MSNT with an  $E||c$  configuration.

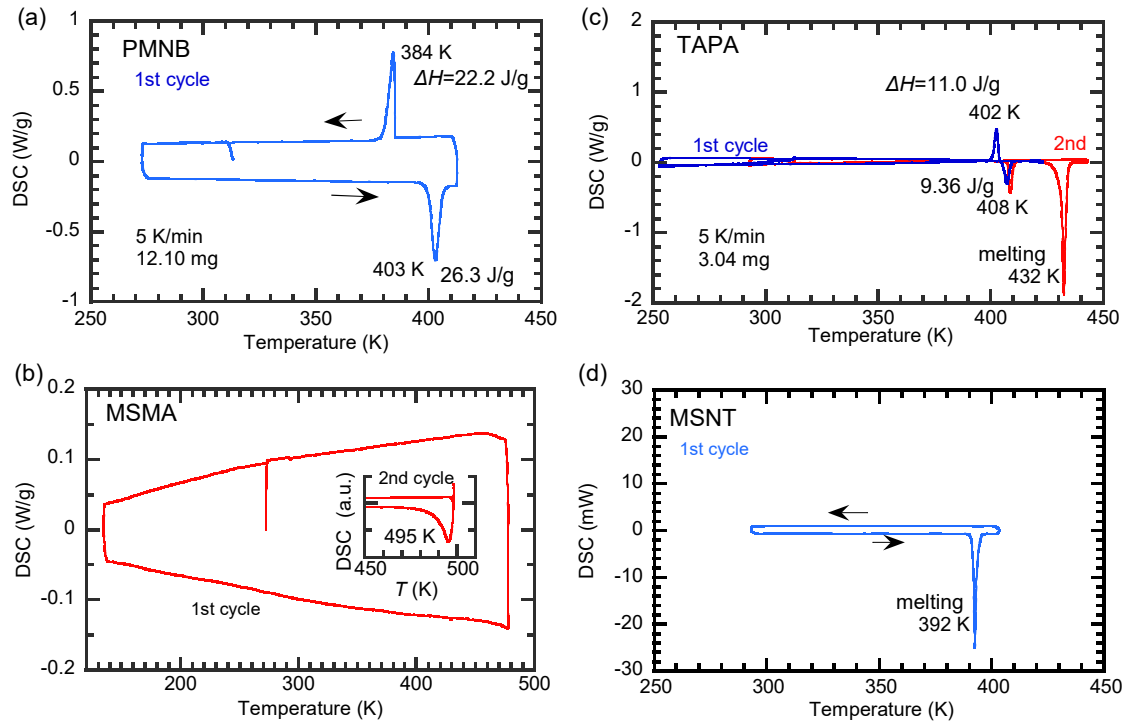

**Figure S4.** Differential scanning calorimetry (DSC) thermograms of (a) PMNB, (b) MSMA, (c) TAPA, and (d) MSNT crystals measured at a heating and cooling rate of 5 K/min.  $\Delta H$  represents the transition enthalpy of the orientational order-disorder phase transitions.
